# Supplementary material for: Proportion and characteristics of screen-detected and non-screen-detected colorectal cancers in Germany
Source: PubMed Central journal article supplement (PMC11609877; doi:10.2340/1651-226x.2024.40234), 2024-11-24
Supplement: AO-63-40234-s1.pdf [file AO-63-40234-s1.pdf]

## **Supplementary material**

**Supplementary Figure 1.** Flow chart illustrating the inclusion of study participants.

**Supplementary Figure 2.** Proportion (including 95% confidence intervals) of advanced CRCs among all sdCRCs, among sdCRCs with codes for symptoms/ selected diagnoses, among those without such codes and among non-sdCRCs in year 2018.

**Supplementary Table 1.** Proportion of sdCRCs with codes indicating symptoms or relevant diagnoses among men and women.

**Supplementary Table 2.** Proportion of advanced CRCs among all sdCRCs, among sdCRCs with codes for symptoms/ selected diagnoses, among those without such codes and among non-sdCRCs, stratified by age group.

**Supplementary Table 3.** Proportion of sdCRCs stratified by tumor localization.

**Supplementary Table 4.** Proportion of patients with at least one comorbidity among men and women with sdCRCs compared to those with non-sdCRCs, stratified by age group (the age distribution within age groups is described in Supplementary Table 4).

**Supplementary Table 5.** Age distribution of men and women with sdCRCs compared to non-sdCRCs.

**Supplementary Figure 1.** Flow chart illustrating the inclusion of study participants.

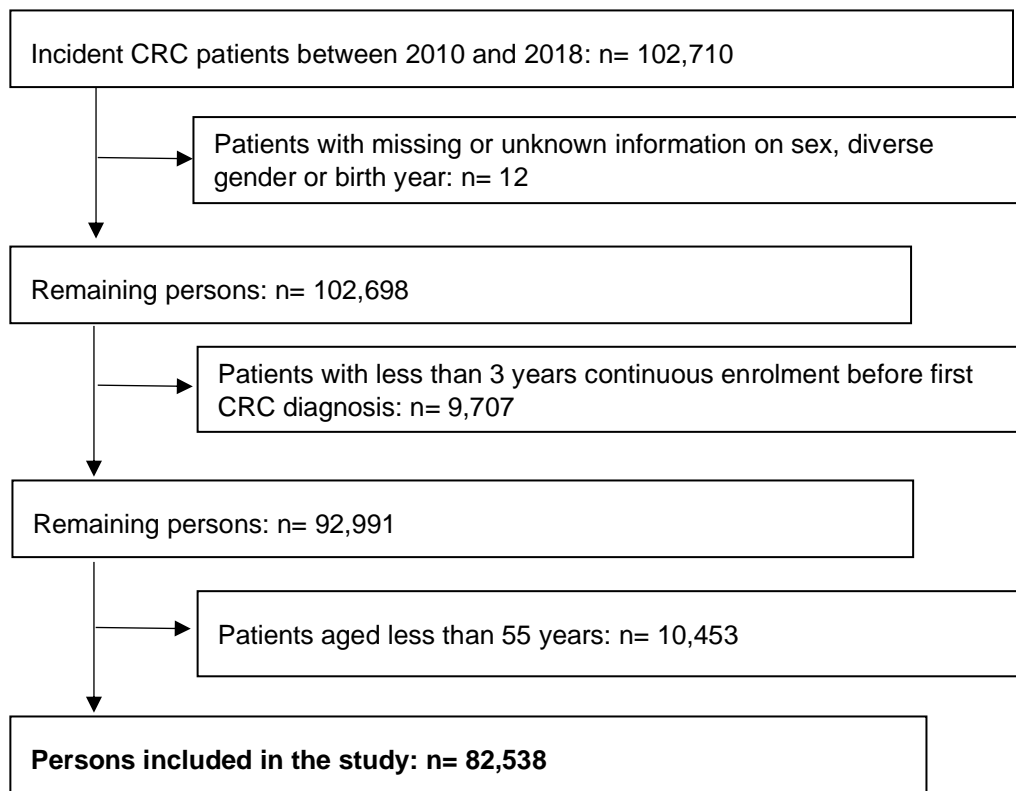

**Supplementary Figure 2.** Proportion of advanced CRCs among all sdCRCs, among sdCRCs with codes for symptoms/ selected diagnoses<sup>1</sup>, among those without such codes and among non-sdCRCs in year 2018.

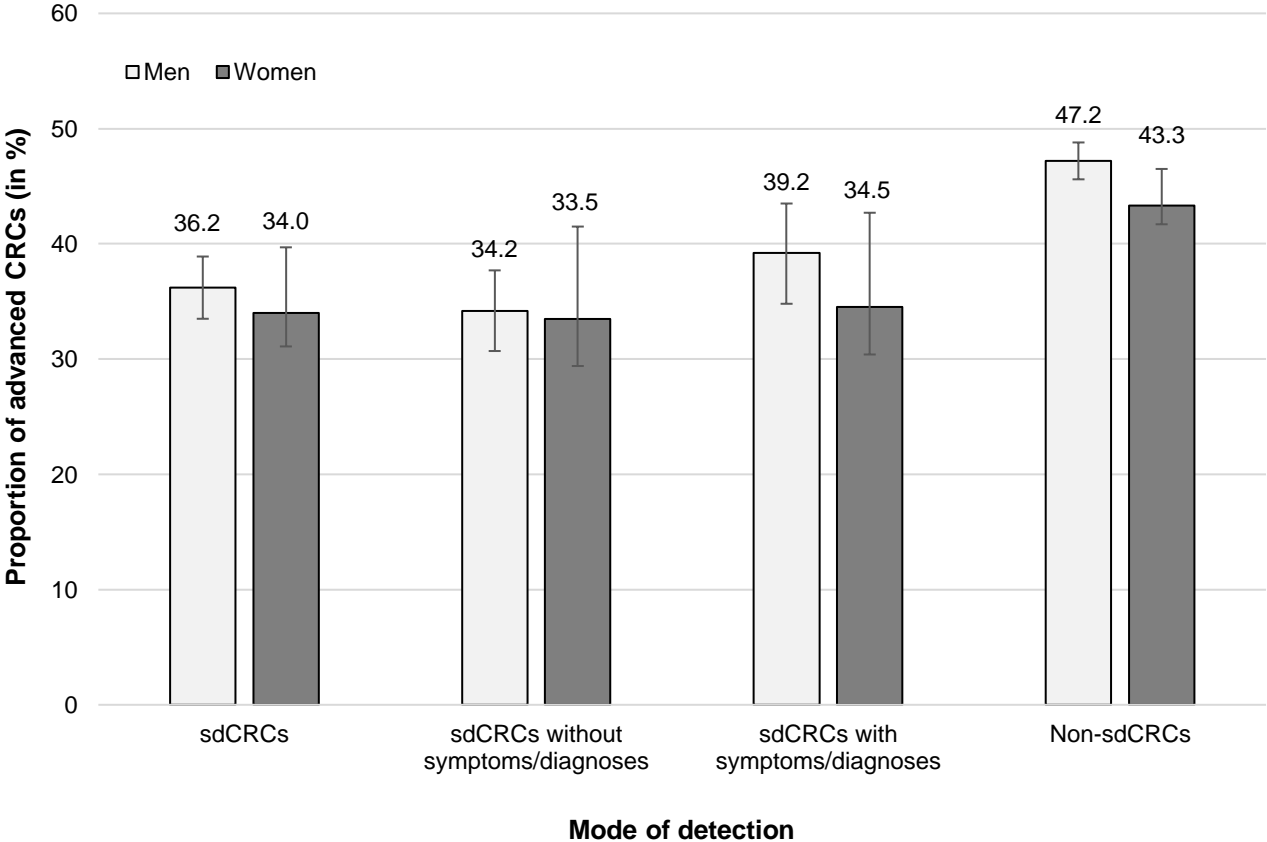

<sup>1</sup>sCRCs with codes indicating symptoms or relevant diagnoses (e.g. Crohn's diseases and/or ulcerative colitis, acute abdominal pain, faecal abnormalities) in the same quarter or before screening colonoscopy/FOBT.

**Supplementary Table 1.** Proportion of sdCRCs with codes indicating symptoms or relevant diagnoses / relevant other codes among men and women (regarding codes for symptoms, please note that it is not clear whether the symptoms were present at the time of the screening examination).

|                                                        | Men           | Women         |
|--------------------------------------------------------|---------------|---------------|
|                                                        | n (%)         | n (%)         |
| <b>All CRCs</b>                                        | 8,432 (100.0) | 6,519 (100.0) |
| <b>Symptoms and diagnosis</b>                          |               |               |
| Crohn's disease <sup>1</sup> and/or ulcerative colitis | 100 (1.2)     | 111 (1.7)     |
| Anemia <sup>2</sup>                                    | 717 (8.5)     | 593 (9.1)     |
| Diverticulosis with bleeding <sup>2</sup>              | 30 (0.4)      | 24 (0.4)      |
| Hemorrhage of anus and rectum <sup>2</sup>             | 282 (3.3)     | 220 (3.4)     |
| Unspecified gastrointestinal bleedings <sup>2</sup>    | 606 (7.2)     | 455 (7.0)     |
| Acute abdominal pain <sup>2</sup>                      | 1,239 (14.7)  | 1,391 (21.3)  |
| Faecal abnormalities <sup>2</sup>                      | 456 (5.4)     | 393 (6.0)     |
| Abnormal weight loss <sup>2</sup>                      | 229 (2.7)     | 189 (2.9)     |
| Irritable bowel syndrome <sup>2</sup>                  | 126 (1.5)     | 139 (2.1)     |
| Family history of CRC <sup>1</sup>                     | 79 (0.9)      | 124 (1.9)     |
| Other abnormalities <sup>2,3</sup>                     | 557 (6.6)     | 549 (8.4)     |
| Any of the above                                       | 3,343 (39.6)  | 3,060 (46.9)  |

<sup>1</sup> Within the same quarter or ever before diagnosis.

<sup>2</sup> Within the same quarter or the quarter before diagnosis.

<sup>3</sup> Other abnormalities include nausea and vomiting, belching, flatulence and meteorism.

**Supplementary Table 2.** Proportion of advanced CRCs among all sdCRCs, among sdCRCs with codes for symptoms/ selected diagnoses<sup>1</sup>, among those without such codes and among non-sdCRCs, stratified by age group.

|                           | Men                                  |                                   |               | Women                                |                                   |               |
|---------------------------|--------------------------------------|-----------------------------------|---------------|--------------------------------------|-----------------------------------|---------------|
|                           | Mode of detection                    |                                   |               | Mode of detection                    |                                   |               |
|                           | sdCRCs                               |                                   | non-sdCRCs    | sdCRCs                               |                                   | non-sdCRCs    |
|                           | Without codes of symptoms/ diagnoses | With codes of symptoms/ diagnoses |               | Without codes of symptoms/ diagnoses | With codes of symptoms/ diagnoses |               |
| n (%)                     | n (%)                                | n (%)                             | n (%)         | n (%)                                | n (%)                             |               |
| <b>Age at diagnosis</b>   |                                      |                                   |               |                                      |                                   |               |
| 55-59 years               |                                      |                                   |               |                                      |                                   |               |
| All CRCs                  | 635 (100.0)                          | 404 (100.0)                       | 2,994 (100.0) | 557 (100.0)                          | 508 (100.0)                       | 2,825 (100.0) |
| <b>Stage at diagnosis</b> |                                      |                                   |               |                                      |                                   |               |
| Advanced                  | 204 (32,1)                           | 170 (42,1)                        | 1,452 (48,5)  | 167 (30,0)                           | 180 (35,4)                        | 1,207 (42,7)  |
| 60-64 years               |                                      |                                   |               |                                      |                                   |               |
| All CRCs                  | 808 (100.0)                          | 470 (100.0)                       | 3,856 (100.0) | 492 (100.0)                          | 433 (100.0)                       | 3,424 (100.0) |
| <b>Stage at diagnosis</b> |                                      |                                   |               |                                      |                                   |               |
| Advanced                  | 281 (34,8)                           | 197 (41,9)                        | 1,908 (49,5)  | 163 (33,1)                           | 175 (40,4)                        | 1,526 (44,6)  |
| 65-69 years               |                                      |                                   |               |                                      |                                   |               |
| All CRCs                  | 971 (100.0)                          | 591 (100.0)                       | 5,010 (100.0) | 577 (100.0)                          | 440 (100.0)                       | 4,391 (100.0) |
| <b>Stage at diagnosis</b> |                                      |                                   |               |                                      |                                   |               |
| Advanced                  | 336 (34,6)                           | 252 (42,6)                        | 2,421 (48,3)  | 167 (28,9)                           | 192 (43,6)                        | 1,977 (45,0)  |
| 70-74 years               |                                      |                                   |               |                                      |                                   |               |

|                           |              |             |               |             |             |               |
|---------------------------|--------------|-------------|---------------|-------------|-------------|---------------|
| All CRCs                  | 1125 (100.0) | 730 (100.0) | 6,663 (100.0) | 731 (100.0) | 622 (100.0) | 5,932 (100.0) |
| <b>Stage at diagnosis</b> |              |             |               |             |             |               |
| Advanced                  | 359 (31,9)   | 291 (39,9)  | 3,151 (47,3)  | 228 (31,2)  | 231 (37,1)  | 2,709 (45,7)  |
| 75-79 years               |              |             |               |             |             |               |
| All CRCs                  | 932 (100.0)  | 648 (100.0) | 6,937 (100.0) | 639 (100.0) | 544 (100.0) | 6,501 (100.0) |
| <b>Stage at diagnosis</b> |              |             |               |             |             |               |
| Advanced                  | 309 (33,1)   | 256 (39,5)  | 3,024 (43,6)  | 187 (29,3)  | 178 (32,7)  | 2,860 (44,0)  |
| 80-84 years               |              |             |               |             |             |               |
| All CRCs                  | 426 (100.0)  | 342 (100.0) | 4,664 (100.0) | 336 (100.0) | 331 (100.0) | 5,288 (100.0) |
| <b>Stage at diagnosis</b> |              |             |               |             |             |               |
| Advanced                  | 138 (32,4)   | 117 (34,2)  | 1,936 (41,5)  | 110 (32,7)  | 110 (33,2)  | 2,126 (40,2)  |
| ≥ 85 years                |              |             |               |             |             |               |
| All CRCs                  | 192 (100.0)  | 158 (100.0) | 3,367 (100.0) | 127 (100.0) | 182 (100.0) | 5,736 (100.0) |
| <b>Stage at diagnosis</b> |              |             |               |             |             |               |
| Advanced                  | 52 (27,1)    | 55 (34,8)   | 1,211 (36,0)  | 38 (29,9)   | 50 (27,5)   | 2,032 (35,4)  |

<sup>1</sup> sCRCs with codes indicating symptoms or relevant diagnoses (e.g. Crohn's diseases and/or ulcerative colitis, acute abdominal pain, faecal abnormalities) in the same quarter or before screening colonoscopy/FOBT.

**Supplementary Table 3.** Proportion of sdCRCs stratified by tumor localization.

|                | Localization |              |              |
|----------------|--------------|--------------|--------------|
|                | Distal       | Proximal     | Both/Unknown |
|                | n (%)        | n (%)        | n (%)        |
| <b>Overall</b> |              |              |              |
| All CRCs       | 44,485 (100) | 28,536 (100) | 9,517 (100)  |
| sdCRCs         | 9,024 (20.3) | 4,603 (16.1) | 1,324 (13.9) |
| <b>Men</b>     |              |              |              |
| All CRCs       | 25,087 (100) | 12,774 (100) | 4,061 (100)  |
| sdCRCs         | 5,594 (22.3) | 2,211 (17.3) | 627 (15.4)   |
| <b>Women</b>   |              |              |              |
| All CRCs       | 19,398 (100) | 15,762 (100) | 5,456 (100)  |
| sdCRCs         | 3,430 (17.7) | 2,392 (15.2) | 697 (12.8)   |

**Supplementary Table 4.** Proportion of patients with at least one comorbidity among men and women with sdCRCs compared to those with non-sdCRCs, stratified by age group (the age distribution within age groups is described in Supplementary Table 5).

|                                        | Men               |               | Women             |               |
|----------------------------------------|-------------------|---------------|-------------------|---------------|
|                                        | Mode of detection |               | Mode of detection |               |
|                                        | sdCRCs            | non-sdCRCs    | sdCRCs            | non-sdCRCs    |
|                                        | n (%)             | n (%)         | n (%)             | n (%)         |
| <b>Age at diagnosis</b>                |                   |               |                   |               |
| 55-64 years                            |                   |               |                   |               |
| All CRCs                               | 2,317 (100.0)     | 6,850 (100.0) | 1,990 (100.0)     | 6,249 (100.0) |
| <b>Comorbidities</b>                   |                   |               |                   |               |
| 1. Coronary heart disease (medication) | 165 (7.1)         | 761 (11.1)    | 62 (3.1)          | 231 (3.7)     |
| 2. Heart failure                       | 49 (2.1)          | 213 (3.1)     | 28 (1.4)          | 83 (1.3)      |
| 3. Acute myocardial infarction         | 15 (0.6)          | 59 (0.9)      | 4 (0.2)           | 12 (0.2)      |
| 4. Acute stroke                        | 16 (0.7)          | 63 (0.9)      | 4 (0.2)           | 20 (0.3)      |
| Any of the above (1-4)                 | 205 (8.8)         | 911 (13.3)    | 84 (4.2)          | 309 (4.9)     |
| 5. COPD                                | 106 (4.6)         | 397 (5.8)     | 97 (4.9)          | 312 (5.0)     |
| 6. Severe liver disease                | 6 (0.3)           | 26 (0.4)      | 3 (0.2)           | 32 (0.5)      |
| 7. End-stage renal disease             | 4 (0.2)           | 48 (0.7)      | 6 (0.3)           | 29 (0.5)      |
| 8. Diabetes with end-organ damage      | 4 (0.2)           | 57 (0.8)      | 1 (0.1)           | 18 (0.3)      |
| Any of the above (1-8)                 | 299 (12.9)        | 1,275 (18.6)  | 175 (8.8)         | 631 (10.1)    |
| 9. Immunosuppressant therapy           | 33 (1.4)          | 224 (3.3)     | 42 (2.1)          | 266 (4.3)     |
| 10. HIV therapy                        | 3 (0.1)           | 14 (0.2)      | 1 (0.1)           | 2 (0.0)       |



|                                                      |               |                |               |                |
|------------------------------------------------------|---------------|----------------|---------------|----------------|
| 11. Hemiplegia                                       | 26 (1.1)      | 147 (2.1)      | 17 (0.9)      | 101 (1.6)      |
| 12. Dementia                                         | 2 (0.1)       | 39 (0.6)       | 3 (0.2)       | 22 (0.4)       |
| Any of the above (1-12)                              | 340 (14.7)    | 1,508 (22.0)   | 223 (11.2)    | 898 (14.4)     |
| 13. Therapy with antidepressants                     | 67 (2.9)      | 240 (3.5)      | 98 (4.9)      | 419 (6.7)      |
| 14. Therapy with antipsychotics                      | 14 (0.6)      | 79 (1.2)       | 24 (1.2)      | 89 (1.4)       |
| Any of the above (13- 14)                            | 76 (3.3)      | 300 (4.4)      | 114 (5.7)     | 482 (7.7)      |
| 15. Liver diseases including chronic viral hepatitis | 258 (11.1)    | 830 (12.1)     | 159 (8.0)     | 516 (8.3)      |
| 16. Treated diabetes                                 | 256 (11.1)    | 1,027 (15.0)   | 121 (6.1)     | 446 (7.1)      |
| 17. Antihypertensive treatment                       | 1,074 (46.4)  | 3,158 (46.1)   | 685 (34.4)    | 2,205 (35.3)   |
| 18. Lipid-modifying agents                           | 296 (12.8)    | 948 (13.8)     | 144 (7.2)     | 460 (7.4)      |
| 19. Asthma                                           | 129 (5.6)     | 331 (4.8)      | 147 (7.4)     | 433 (6.9)      |
| 20. Obesity                                          | 440 (19.0)    | 1,258 (18.4)   | 336 (16.9)    | 1,111 (17.8)   |
| <b>65-74 years</b>                                   |               |                |               |                |
| All CRCs                                             | 3,417 (100.0) | 11,673 (100.0) | 2,370 (100.0) | 10,323 (100.0) |
| <b>Comorbidities</b>                                 |               |                |               |                |
| 1. Coronary heart disease (medication)               | 580 (17.0)    | 2,491 (21.3)   | 175 (7.4)     | 1,124 (10.9)   |
| 2. Heart failure                                     | 191 (5.6)     | 878 (7.5)      | 72 (3.0)      | 504 (4.9)      |
| 3. Acute myocardial infarction                       | 30 (0.9)      | 185 (1.6)      | 6 (0.3)       | 70 (0.7)       |
| 4. Acute stroke                                      | 47 (1.4)      | 207 (1.8)      | 13 (0.5)      | 95 (0.9)       |
| Any of the above (1-4)                               | 705 (20.7)    | 3,004 (25.7)   | 230 (9.7)     | 1,479 (14.3)   |
| 5. COPD                                              | 220 (6.4)     | 1,011 (8.7)    | 155 (6.5)     | 869 (8.4)      |
| 6. Severe liver disease                              | 7 (0.2)       | 37 (0.3)       | 3 (0.1)       | 33 (0.3)       |
| 7. End-stage renal disease                           | 24 (0.7)      | 169 (1.4)      | 9 (0.4)       | 89 (0.9)       |
| 8. Diabetes with end-organ damage                    | 13 (0.4)      | 116 (1.0)      | 4 (0.2)       | 47 (0.5)       |
| Any of the above (1-8)                               | 871 (25.5)    | 3,703 (31.7)   | 372 (15.7)    | 2,200 (21.3)   |

|                                                      |               |                |               |                |
|------------------------------------------------------|---------------|----------------|---------------|----------------|
| 9. Immunosuppressant therapy                         | 61 (1.8)      | 411 (3.5)      | 70 (3.0)      | 427 (4.1)      |
| 10. HIV therapy                                      | 0 (0.0)       | 14 (0.1)       | 0 (0.0)       | 1 (0.0)        |
| 11. Hemiplegia                                       | 51 (1.5)      | 330 (2.8)      | 28 (1.2)      | 199 (1.9)      |
| 12. Dementia                                         | 38 (1.1)      | 240 (2.1)      | 13 (0.5)      | 196 (1.9)      |
| Any of the above (1-12)                              | 936 (27.4)    | 4,099 (35.1)   | 440 (18.6)    | 2,656 (25.7)   |
| 13. Therapy with antidepressants                     | 58 (1.7)      | 266 (2.3)      | 89 (3.8)      | 547 (5.3)      |
| 14. Therapy with antipsychotics                      | 18 (0.5)      | 74 (0.6)       | 20 (0.8)      | 118 (1.1)      |
| Any of the above (13-14)                             | 73 (2.1)      | 323 (2.8)      | 102 (4.3)     | 639 (6.2)      |
| 15. Liver diseases including chronic viral hepatitis | 441 (12.9)    | 1,517 (13.0)   | 264 (11.1)    | 1,124 (10.9)   |
| 16. Treated diabetes                                 | 688 (20.2)    | 2,469 (21.1)   | 238 (10.0)    | 1,309 (12.7)   |
| 17. Antihypertensive treatment                       | 2,111 (61.8)  | 7,285 (62.4)   | 1,270 (53.6)  | 5,628 (54.5)   |
| 18. Lipid-modifying agents                           | 751 (22.0)    | 2,721 (23.3)   | 315 (13.3)    | 1,599 (15.5)   |
| 19. Asthma                                           | 167 (4.9)     | 569 (4.9)      | 158 (6.7)     | 819 (7.9)      |
| 20. Obesity                                          | 701 (20.5)    | 2,305 (19.7)   | 450 (19.0)    | 1,947 (18.9)   |
| <b>≥75 years</b>                                     |               |                |               |                |
| All CRCs                                             | 2,698 (100.0) | 14,967 (100.0) | 2,159 (100.0) | 17,525 (100.0) |
| <b>Comorbidities</b>                                 |               |                |               |                |
| 1. Coronary heart disease (medication)               | 738 (27.4)    | 4,950 (33.1)   | 369 (17.1)    | 3,984 (22.7)   |
| 2. Heart failure                                     | 299 (11.1)    | 2,398 (16.0)   | 224 (10.4)    | 2,771 (15.8)   |
| 3. Acute myocardial infarction                       | 29 (1.1)      | 303 (2.0)      | 15 (0.7)      | 204 (1.2)      |
| 4. Acute stroke                                      | 37 (1.4)      | 366 (2.4)      | 25 (1.2)      | 382 (2.2)      |
| Any of the above (1-4)                               | 897 (33.3)    | 6,182 (41.3)   | 523 (24.2)    | 5,715 (32.6)   |
| 5. COPD                                              | 228 (8.4)     | 1,622 (10.8)   | 157 (7.3)     | 1,523 (8.7)    |
| 6. Severe liver disease                              | 0 (0.0)       | 25 (0.2)       | 2 (0.1)       | 28 (0.2)       |
| 7. End-stage renal disease                           | 41 (1.5)      | 368 (2.5)      | 18 (0.8)      | 246 (1.4)      |

|                                                      |              |               |              |               |
|------------------------------------------------------|--------------|---------------|--------------|---------------|
| 8. Diabetes with end-organ damage                    | 19 (0.7)     | 186 (1.2)     | 5 (0.2)      | 127 (0.7)     |
| Any of the above (1-8)                               | 1,045 (38.7) | 7,057 (47.2)  | 631 (29.2)   | 6,697 (38.2)  |
| 9. Immunosuppressant therapy                         | 63 (2.3)     | 588 (3.9)     | 68 (3.1)     | 702 (4.0)     |
| 10. HIV therapy                                      | 1 (0.0)      | 4 (0.0)       | 0 (0.0)      | 0 (0.0)       |
| 11. Hemiplegia                                       | 71 (2.6)     | 575 (3.8)     | 31 (1.4)     | 507 (2.9)     |
| 12. Dementia                                         | 118 (4.4)    | 1,267 (8.5)   | 76 (3.5)     | 1,896 (10.8)  |
| Any of the above (1-12)                              | 1,140 (42.3) | 7,879 (52.6)  | 721 (33.4)   | 8,056 (46.0)  |
| 13. Therapy with antidepressants                     | 40 (1.5)     | 393 (2.6)     | 86 (4.0)     | 1,012 (5.8)   |
| 14. Therapy with antipsychotics                      | 3 (0.1)      | 55 (0.4)      | 8 (0.4)      | 118 (0.7)     |
| Any of the above (13-14)                             | 43 (1.6)     | 438 (2.9)     | 92 (4.3)     | 1,098 (6.3)   |
| 15. Liver diseases including chronic viral hepatitis | 331 (12.3)   | 1,910 (12.8)  | 236 (10.9)   | 1,825 (10.4)  |
| 16. Treated diabetes                                 | 538 (19.9)   | 3,303 (22.1)  | 300 (13.9)   | 2,810 (16.0)  |
| 17. Antihypertensive treatment                       | 1,951 (72.3) | 11,139 (74.4) | 1,502 (69.6) | 12,852 (73.3) |
| 18. Lipid-modifying agents                           | 714 (26.5)   | 4,069 (27.2)  | 455 (21.1)   | 3,353 (19.1)  |
| 19. Asthma                                           | 156 (5.8)    | 831 (5.6)     | 147 (6.8)    | 1,164 (6.6)   |
| 20. Obesity                                          | 442 (16.4)   | 2,460 (16.4)  | 399 (18.5)   | 2,892 (16.5)  |

**Supplementary Table 5.** Age distribution of men and women with sdCRCs compared to non-sdCRCs.

|             | Men               |            | Women             |            |
|-------------|-------------------|------------|-------------------|------------|
|             | Mode of detection |            | Mode of detection |            |
|             | sdCRCs            | non-sdCRCs | sdCRCs            | non-sdCRCs |
| <b>Age</b>  |                   |            |                   |            |
| 55-64 years |                   |            |                   |            |
| Mean        | 59.9              | 59.9       | 59.3              | 60.0       |
| Median      | 60.0              | 60.0       | 59.0              | 60.0       |
| 65-74 years |                   |            |                   |            |
| Mean        | 70.0              | 70.0       | 69.9              | 70.0       |
| Median      | 70.0              | 70.0       | 70.0              | 70.0       |
| ≥75 years   |                   |            |                   |            |
| Mean        | 79.6              | 81.0       | 79.9              | 82.3       |
| Median      | 79.0              | 80.0       | 79.0              | 81.0       |
